# Supplementary material
Source: PubMed Central journal article supplement (PMC2793301)
Supplement: E09-06-0521_1.pdf [file E09-06-0521_1.pdf]

## Supplemental materials (Markgraf *et al.*)

### Figure S1. Vps21 compartment formation depends on Vps8 expression levels.

(A) Vps8 expression levels. Cells carrying GFP-Vps21 under the control of the *ADHI* promoter and overexpressing HA-Vps8 were grown in galactose and then shifted to the glucose containing medium. At the indicated time points, cell extracts were prepared and analyzed by SDS-PAGE followed by Western blotting using antibodies against the HA tag or Vac8 (loading control). Control cells contain HA-tagged Vps8 under the control of the authentic promoter.

(B) Localization of GFP-Vps21 upon Vps8 depletion. The cells were imaged at the same time points as in (A).

(C) Localization of GFP-Vps21 in wild type (wt) and *vps8* $\Delta$  cells. Fluorescence microscopy analysis was done as in Figure 1A. Size bar = 10 $\mu$ m.

(D-F) Comparison between strains expressing GFP-Vps21 either from the *PHO5* (D,F) or the *ADHI* promoter (E) in response to Vps8-overexpression. All strains were grown in YPG medium and analyzed as in (A). D,E are in a BY4741 background, F in a SEY6210 background strain.

(G) Vps21 expression levels in glucose (D)- and galactose (G)-containing media in presence or absence of Vps8. Cell extracts were analyzed by Western blotting using antibodies against the indicated proteins.

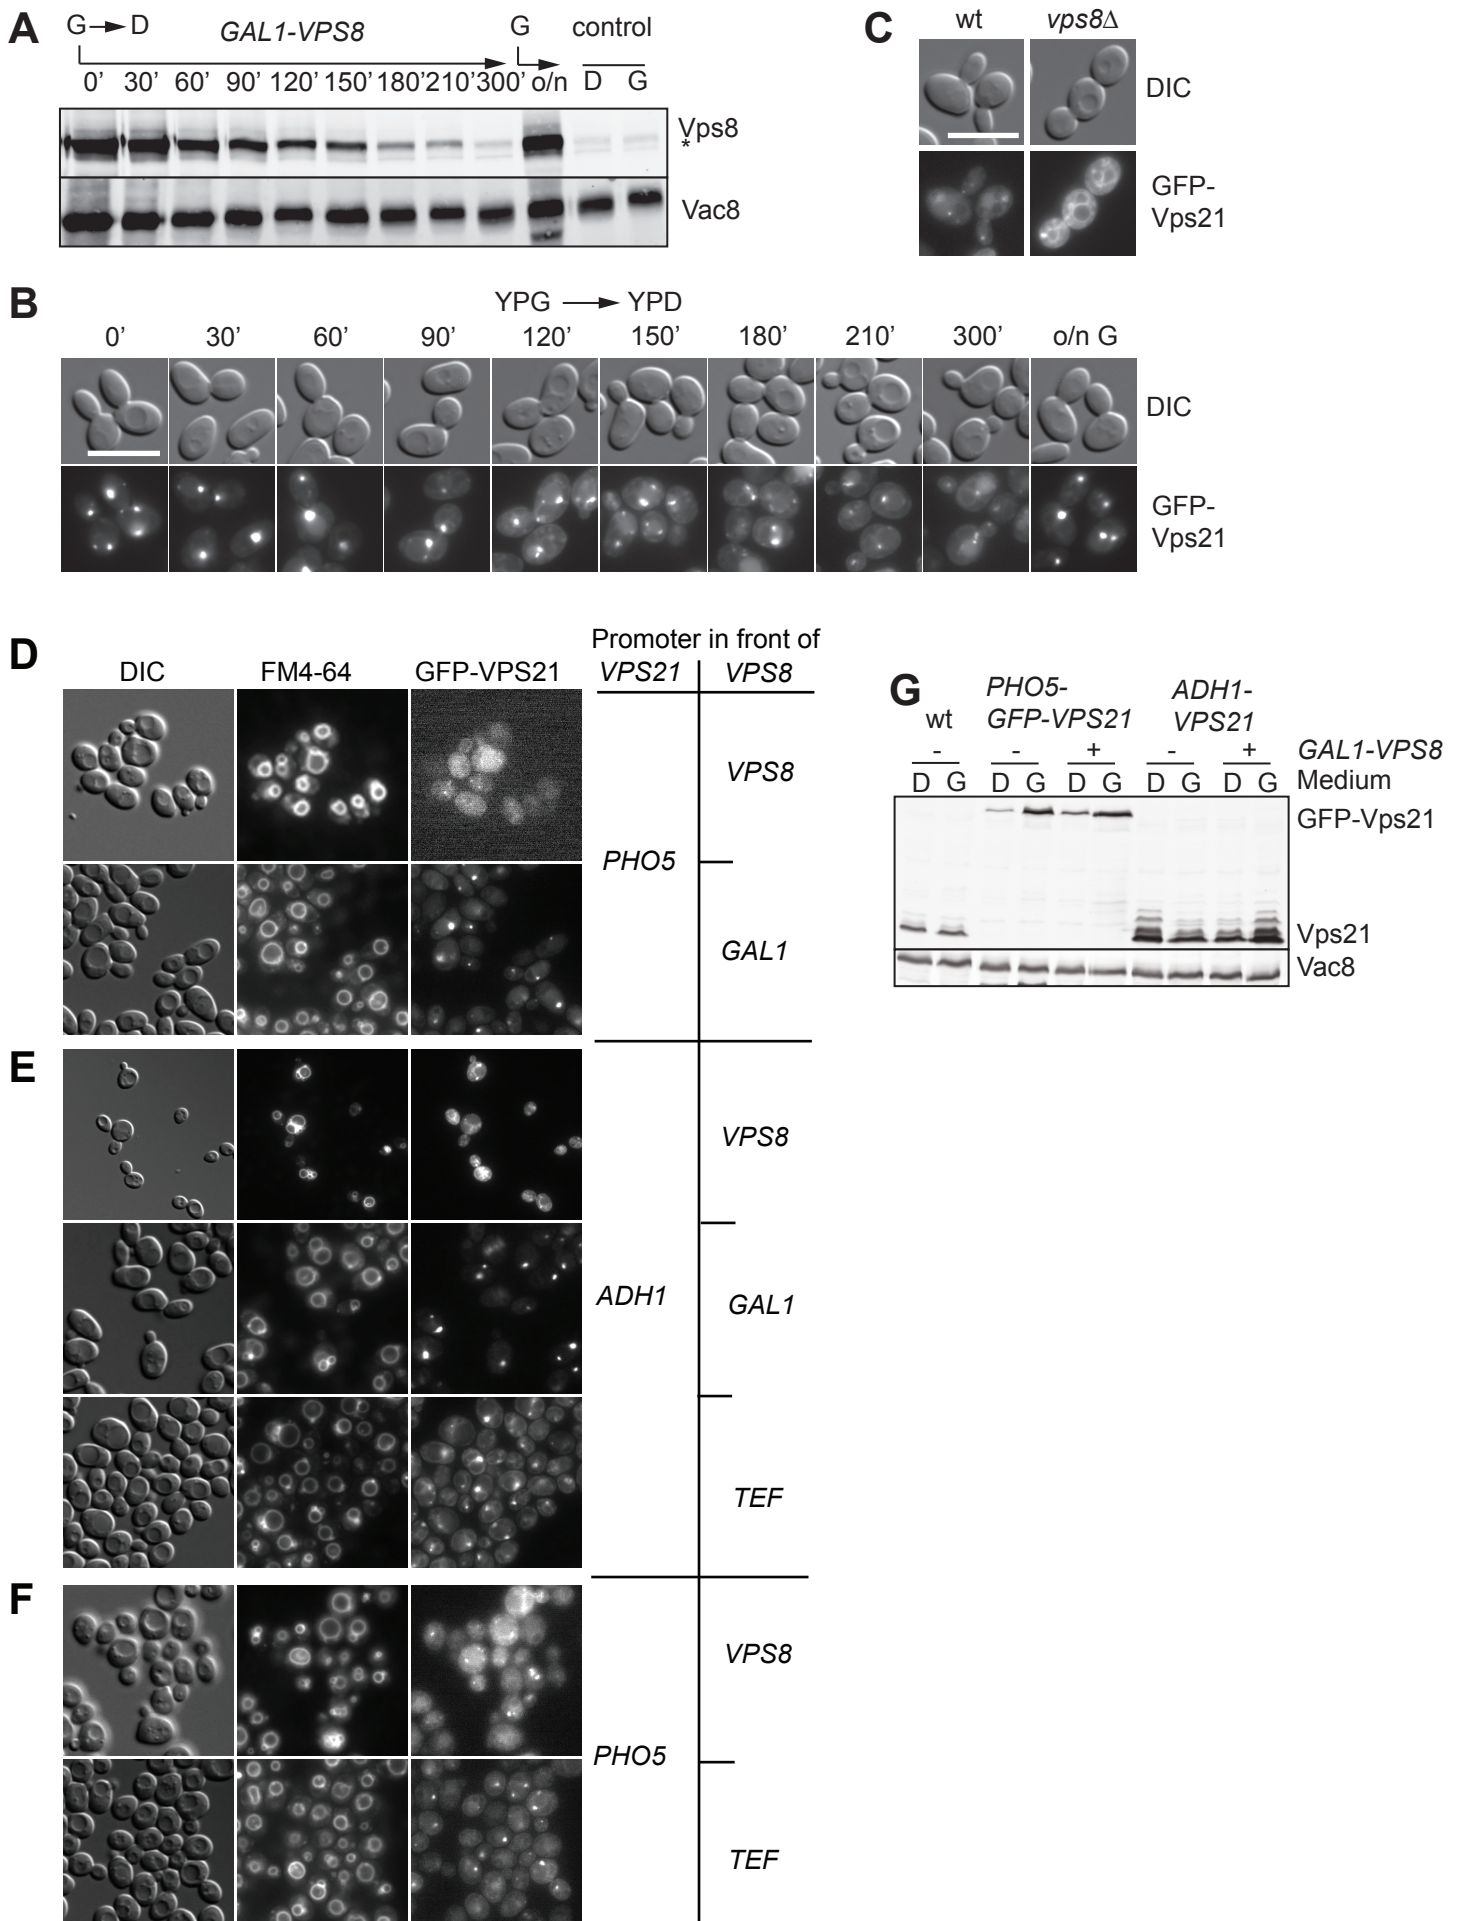

**Table S1**

| Strain  | Genotype                                                                                            | Reference              |
|---------|-----------------------------------------------------------------------------------------------------|------------------------|
| CUY100  | BY4727 MATalpha <i>his3Δ200 leu2Δ0 lys2Δ0 met15Δ0 trp1Δ63 ura3Δ0</i>                                | EUROSCARF library      |
| CUY105  | BY4732 MATa <i>his3Δ200 leu2Δ0 met15Δ0 trp1Δ63 ura3Δ0</i>                                           | EUROSCARF library      |
| CUY106  | BY4733 MATalpha <i>his3Δ200 leu2Δ0 met15Δ0 trp1Δ63 ura3Δ0</i>                                       | EUROSCARF library      |
| CUY473  | MATa <i>his3Δ leu2Δ met15Δ ura3Δ vps8Δ::kanMX</i>                                                   | EUROSCARF library      |
| CUY482  | MATa <i>his3Δ leu2Δ met15Δ ura3Δ vps21Δ::kanMX</i>                                                  | EUROSCARF library      |
| CUY520  | MATa <i>his3Δ leu2Δ met15Δ ura3Δ vps33Δ::kanMX</i>                                                  | EUROSCARF library      |
| CUY521  | MATa <i>his3Δ leu2Δ met15Δ ura3Δ vps16Δ::kanMX</i>                                                  | EUROSCARF library      |
| CUY523  | MATa <i>his3Δ leu2Δ met15Δ ura3Δ vps18Δ::kanMX</i>                                                  | EUROSCARF library      |
| CUY594  | MATa <i>his3Δ leu2Δ met15Δ ura3Δ pep12Δ::kanMX</i>                                                  | EUROSCARF library      |
| CUY827  | CUY2008; <i>VPS21::natNT2-ADHpr</i>                                                                 | This study             |
| CUY902  | MATa <i>his3Δ leu2Δ met15Δ ura3Δ vps45Δ::kanMX</i>                                                  | EUROSCARF library      |
| CUY1014 | MATa <i>his3Δ leu2Δ met15Δ ura3Δ vps3Δ::kanMX</i>                                                   | EUROSCARF library      |
| CUY1030 | MATa <i>his3Δ leu2Δ met15Δ ura3Δ VPS41::HIS5-PHO5pr-GFP-Myc</i>                                     | Takeda et al., 2008    |
| CUY1792 | MATa <i>his3Δ1 leu2Δ0 met15Δ0 ura3Δ0 VPS8::TAP-kanMX</i>                                            | Peplowska et al., 2007 |
| CUY1795 | MATa <i>his3Δ1 leu2Δ0 met15Δ0 ura3Δ0 VPS3::TAP-URA3</i>                                             | Peplowska et al., 2007 |
| CUY1818 | CUY100; <i>VPS21::URA3-PHO5pr-GFP</i>                                                               | This study             |
| CUY1819 | CUY473; <i>VPS21::URA3-PHO5pr-GFP</i>                                                               | This study             |
| CUY1846 | MATa <i>his3Δ leu2Δ met15Δ ura3Δ VPS3::TAP-URA3 VPS3::HIS3-GAL1pr</i>                               | Peplowska et al., 2007 |
| CUY1874 | CUY1792; <i>VPS8::HIS3-GAL1pr</i>                                                                   | This study             |
| CUY1896 | CUY105; <i>VPS41::TRP1-GAL1pr</i>                                                                   | This study             |
| CUY2008 | CUY106; <i>VPS8::TRP1-GAL1pr-3HA</i>                                                                | This study             |
| CUY2123 | MATa <i>his3Δ1 leu2Δ0 met15Δ0 ura3Δ0 vps9Δ::kanMX</i>                                               | EUROSCARF library      |
| CUY2152 | CUY1896; <i>VPS41::TAP-URA3</i>                                                                     | This study             |
| CUY2253 | MATalpha <i>his3Δ200 leu2Δ0 met15Δ0 trp1Δ63 ura3Δ0 VPS8::TRP1-GAL1pr-3HA VPS21::URA3-PHO5pr-GFP</i> | Peplowska et al., 2007 |
| CUY2260 | CUY2008; <i>VPS3::TAP-URA3</i>                                                                      | This study             |
| CUY2267 | CUY2123; <i>VPS21::URA3-PHO5pr-GFP</i>                                                              | This study             |
| CUY2268 | CUY902; <i>VPS21::URA3-PHO5pr-GFP</i>                                                               | This study             |
| CUY2569 | CUY100; <i>VPS18::TAP-URA3</i>                                                                      | This study             |
| CUY2270 | CUY594; <i>VPS21::URA3-PHO5pr-GFP</i>                                                               | This study             |
| CUY2278 | MATa <i>his3Δ leu2Δ met15Δ ura3Δ vps3Δ::kanMX VPS21::URA3 PHO5pr-GFP VPS8::HIS3-GAL1pr-3HA</i>      | Peplowska et al., 2007 |

|         |                                                                                    |                       |
|---------|------------------------------------------------------------------------------------|-----------------------|
| CUY2590 | CUY100; <i>URA3::pRS316-STE3-GFP</i>                                               | This study            |
| CUY2593 | CUY100; <i>CPS1::URA3-PHO5pr-GFP</i>                                               | This study            |
| CUY2650 | CUY1014; <i>CPS1::URA3-PHO5pr-GFP</i>                                              | This study            |
| CUY2653 | CUY473; <i>CPS1::URA3-PHO5pr-GFP</i>                                               | This study            |
| CUY2682 | CUY2268; <i>VPS8::HIS3-GAL1pr-3HA</i>                                              | This study            |
| CUY2694 | SEY6210 MATalpha <i>leu2-3,112 ura3-52 his3-Δ200 trp-Δ901 lys2-801 suc2-Δ9 GAL</i> | Robinson et al., 1988 |
| CUY2695 | CUY2694; <i>VPS21::URA3-PHO5pr-GFP</i>                                             | This study            |
| CUY2696 | CUY106; <i>VPS21::URA3-PHO5pr-GFP</i>                                              | This study            |
| CUY2704 | CUY1014; <i>URA3::pRS316-STE3-GFP</i>                                              | This study            |
| CUY2705 | CUY473; <i>URA3::pRS316-STE3-GFP</i>                                               | This study            |
| CUY2715 | CUY1818; <i>VPS8::HIS3-GAL1pr-3HA</i>                                              | This study            |
| CUY2716 | CUY2696; <i>VPS8::HIS3-GAL1pr-3HA</i>                                              | This study            |
| CUY2719 | CUY2008; <i>VPS21::natNT2-ADHpr-GFP</i>                                            | This study            |
| CUY2762 | CUY2716; <i>pV2-PHO5pr-RFP-CPS1 (TRP1)</i>                                         | This study            |
| CUY2767 | CUY2696; <i>pV2-PHO5pr-RFP-PEP12 (TRP1)</i>                                        | This study            |
| CUY2768 | CUY2716; <i>pV2-PHO5pr-RFP-PEP12 (TRP1)</i>                                        | This study            |
| CUY2770 | CUY827; <i>URA3::pRS316-STE3-GFP</i>                                               | This study            |
| CUY2771 | CUY827; <i>VPS39::URA3-PHO5pr-GFP</i>                                              | This study            |
| CUY2772 | CUY827; <i>VPS3::URA3-PHO5pr-GFP</i>                                               | This study            |
| CUY2773 | CUY827; <i>VPS41::HIS3-PHO5pr-GFP</i>                                              | This study            |
| CUY2842 | CUY106; <i>VPS21::natNT2-ADH1pr</i>                                                | This study            |
| CUY2843 | CUY2842; <i>VPS8::HIS3-GAL1pr-GFP</i>                                              | This study            |
| CUY2844 | CUY2267; <i>VPS8::HIS3-GAL1pr-3HA</i>                                              | This study            |
| CUY2845 | CUY2695; <i>VPS8::natNT2-TEFpr</i>                                                 | This study            |
| CUY2871 | CUY2270; <i>VPS8::HIS3-GAL1pr-3HA</i>                                              | This study            |
| CUY2896 | CUY106; <i>VPS8::HIS3-GAL1pr-GFP</i>                                               | This study            |
| CUY2900 | CUY106; <i>VPS11::TAP-URA3</i>                                                     | This study            |
| CUY2921 | CUY1014; <i>VPS8::HIS3-GALpr-GFP</i>                                               | This study            |
| CUY2922 | CUY482; <i>VPS8::HIS3-GAL1pr-GFP</i>                                               | This study            |
| CUY2935 | CUY106; <i>VPS11::GFP-hphNT1</i>                                                   | This study            |
| CUY2949 | CUY2920; <i>VPS3::TAP-URA3</i>                                                     | This study            |
| CUY2950 | CUY827; <i>VPS3::TAP-URA3</i>                                                      | This study            |
| CUY3025 | CUY105; <i>VPS18::GFP-hpNT1</i>                                                    | This study            |
| CUY3026 | CUY105; <i>VPS16::GFP-hpNT1</i>                                                    | This study            |

|         |                                                                                       |            |
|---------|---------------------------------------------------------------------------------------|------------|
| CUY3217 | CUY827; <i>VPS11::GFP-hphNT1</i>                                                      | This study |
| CUY3243 | CUY106; <i>VAM3::URA3-PHO5pr-GFP</i>                                                  | This study |
| CUY3244 | CUY106; <i>VPS3::URA3-PHO5pr-GFP</i>                                                  | This study |
| CUY3277 | CUY827; <i>VPS18::GFP-hpNT1</i>                                                       | This study |
| CUY3279 | CUY521; <i>VPS8::HIS3-GAL1pr-3HA</i>                                                  | This study |
| CUY3289 | CUY523; <i>VPS8::HIS3-GAL1pr-3HA</i>                                                  | This study |
| CUY3404 | CUY827; <i>VPS16::GFP-KanMX</i>                                                       | This study |
| CUY3311 | CUY3283; <i>VPS21::natNT2-ADH1pr</i>                                                  | This study |
| CUY3312 | CUY3279; <i>VPS21::URA3-PHO5pr-GFP</i>                                                | This study |
| CUY3315 | CUY3289; <i>VPS21::URA3-PHO5pr-GFP</i>                                                | This study |
| CUY3324 | CUY2922; <i>GAL1pr::pRS406-GAL1pr-VPS21 Q66L</i>                                      | This study |
| CUY3337 | CUY2694; <i>VPS21::KanMX-ADH1pr</i>                                                   | This study |
| CUY3338 | CUY2694; <i>VPS8::natNT2-TEFpr-GFP</i>                                                | This study |
| CUY3339 | CUY520; <i>VPS8::HIS3-GAL1pr-3HA</i>                                                  | This study |
| CUY3358 | CUY3339; <i>VPS21::URA3-PHO5pr-GFP</i>                                                | This study |
| CUY3359 | CUY3338; <i>VPS21::kanMX-ADH1pr</i>                                                   | This study |
| CUY3381 | CUY106; <i>pV2-PHO5pr-RFP-VPS21 (TRP1)</i>                                            | This study |
| CUY3382 | CUY2896; <i>pV2-PHO5pr-RFP-VPS21 (TRP1)</i>                                           | This study |
| CUY3391 | CUY2253; <i>vps11Δ::HIS3</i>                                                          | This study |
| CUY3393 | CUY2922; <i>GAL1pr::pRS406-GAL1pr-VPS21 S21N</i>                                      | This study |
| CUY3399 | CUY106; <i>VAC1::URA3-PHO5pr-GFP</i>                                                  | This study |
| CUY3402 | CUY827; <i>VAC1::URA3-PHO5pr-GFP</i>                                                  | This study |
| CUY3403 | CUY2253; <i>VPS3::kanMX-GAL1pr</i>                                                    | This study |
| CUY3422 | CUY2696; <i>pV2-PHO5pr-RFP-VAM3 (TRP1)</i>                                            | This study |
| CUY3423 | CUY2716; <i>pV2-PHO5pr-RFP-VAM3 (TRP1)</i>                                            | This study |
| CUY3564 | CUY3359; <i>VPS4::URA3</i>                                                            | This study |
| CUY3593 | CUY3337; <i>VPS8::natNT2-TEFpr</i>                                                    | This study |
| CUY3616 | CUY3593; <i>CPS1::URA3-PHO5pr-GFP</i>                                                 | This study |
| CUY3625 | MATalpha <i>leu2-3,112 ura3-52 his3-Δ200 trp-Δ901 lys2-801 suc2-Δ9 GAL vam3::TRP1</i> | This study |
| CUY3626 | CUY2694; <i>CPS1::URA3-PHO5pr-GFP</i>                                                 | This study |
| CUY3632 | CUY3625; <i>CPS1::URA3-PHO5pr-GFP</i>                                                 | This study |
| CUY3633 | CUY2253; <i>MNN9::td-TOMATO-kanMX</i>                                                 | This study |
| CUY3667 | CUY3391; <i>MNN9::td-TOMATO-kanMX</i>                                                 | This study |
| CUY3668 | CUY827; <i>CPS1::URA3-PHO5pr-GFP</i>                                                  | This study |

|         |                                           |            |
|---------|-------------------------------------------|------------|
| CUY3669 | CUY3655; <i>CPS1::URA3-PHO5pr-GFP</i>     | This study |
| CUY3677 | CUY2715; <i>VPS8::TAP-TRP1</i>            | This study |
| CUY3678 | CUY3101; <i>VPS8::TAP-TRP1</i>            | This study |
| CUY3722 | CUY2921; <i>URA3::pRS406-GAL1pr-VPS21</i> | This study |
| CUY4007 | CUY106; <i>VPS21::natNT2-GFP-ADHpr</i>    | This study |
| CUY4043 | CUY4007; <i>VPS8::kanMX-TEF</i>           | This study |
| CUY4126 | CUY2694; <i>VPS10::GFP-TRP1</i>           | This study |
| CUY4128 | CUY2694; <i>vps26Δ::HIS3</i>              | This study |
| CUY4146 | CUY3338; <i>vps4Δ::URA3</i>               | This study |
| CUY4344 | CUY3593; <i>VPS10::GFP-TRP1</i>           | This study |
| CUY4345 | CUY4128; <i>VPS10::GFP-TRP1</i>           | This study |
